# Supplementary material for: Integrating Genomic Tools to Predict Climate Adaptation and Vulnerability across a Latitudinal Gradient in a Brazilian Atlantic Forest Treefrog (Dendropsophus elegans)
Source: Research Square preprint supplement (doi:10.21203/rs.3.rs-7706720/v1), 2025-10-27
Supplement: Supplementary file 1 [file 17afed0a6552976ff6eb1974.docx]

**Integrating Genomic Tools to Predict Climate Adaptation and Vulnerability across a Latitudinal Gradient in a Brazilian Atlantic Forest Treefrog (*Dendropsophus elegans*)**

Supplementary Material 1

*List of scientific collections assessed:*

CNRS/AF - Personal Collection Antonie Fouguet (Cayenne, French Guiana)

INPA/HT - Herpetology Collection at the Instituto Nacional de Pesquisas da Amazônia (Manaus, Brazil)

MTR – Miguel T. Rodrigues collection at the Universidade Federal de São Paulo (São Paulo, Brazil)

PUCRS - Pontifícia Universidade Católica do Rio Grande do Sul (Porto Alegre, Brazil)

UFBA - Herpetology Collection of Universidade Federal da Bahia (Salvador, Brazil)

UFES - Herpetology Collection of Universidade Federal do Espírito Santo (Vitória, Brazil)

UFRN - Herpetology Collection of Universidade Federal do Rio Grande do Norte (Natal, Brazil)

UNESP - Herpetology Collection of Universidade Estadual Paulista Júlio de Mesquita Filho (Rio

Claro, Brazil)

# Supplementary Figures and Tables

# Table S1. *Dendropsophus elegans* sampled specimens used in next-generation sequencing including voucher number and locality of origin. *these samples were discarded from the analyses.

| **Voucher** | **Latitude** | **Longitude** | **Locality** | **State** | **Country** |
| --- | --- | --- | --- | --- | --- |
| H-568 | -23.8064 | -46.059 | Bertioga | São Paulo | Brazil |
| H-579 | -23.8064 | -46.059 | Bertioga | São Paulo | Brazil |
| JC804 | -20.3633 | -43.3702 | Mariana | Minas Gerais | Brazil |
| JFT1035 | -13.3537 | -39.0879 | Valença | Bahia | Brazil |
| MRT5820 | -15.1138 | -39.5382 | Serra do Teimoso, Jussari | Bahia | Brazil |
| MRT5879 | -15.1138 | -39.5382 | Serra do Teimoso, Jussari | Bahia | Brazil |
| MTR12063 | -19.3616 | -40.0878 | Linhares, Reserva da Companhia Vale do Rio Doce | Espírito Santo | Brazil |
| MTR12145 | -19.3616 | -40.0878 | Linhares, Reserva da Companhia Vale do Rio Doce | Espírito Santo | Brazil |
| MTR12594 | -20.5201 | -41.7176 | Parque Nacional do Caparaó, Santa Maria | Espírito Santo | Brazil |
| MTR12606 | -20.5201 | -41.7176 | Parque Nacional do Caparaó, Santa Maria | Espírito Santo | Brazil |
| MTR17020 | -22.1972 | -48.7754 | E.B. Boracéia | São Paulo | Brazil |
| MTR17021 | -22.1972 | -48.7754 | E.B. Boracéia | São Paulo | Brazil |
| MTR17218 | -16.4333 | -40.7832 | Reserva Biológica Mata Escura, Jequitinhonha | Minas Gerais | Brazil |
| MTR17562 | -19.7097 | -42.7345 | Parque Estadual do Rio Doce, Marliéria | Minas Gerais | Brazil |
| MTR22883 | -22.5991 | -43.223 | Taquara, Duque de Caxias | Rio de Janeiro | Brazil |
| UFBA7872 | -12.5151 | -38.0355 | Mata de São João, Reserva Camurujipe, Ponto 1 | Bahia | Brazil |
| UFBA7873 | -12.5151 | -38.0355 | Mata de São João, Reserva Camurujipe | Bahia | Brazil |
| UFRN3666 | -20.7594 | -42.8618 | Mata da Biologia - campus UFV, Viçosa | Minas Gerais | Brazil |
| UFRN9039 | -9.7625 | -36.1328 | São Miguel dos Campos | Alagoas | Brazil |
| UFRN9158 | -11.2651 | -37.4215 | Estância | Sergipe | Brazil |
| UFRN9700 | -12.9711 | -39.3949 | Varzedo | Bahia | Brazil |
| UFRN9705 | -12.9711 | -39.3949 | Varzedo | Bahia | Brazil |
| UNESP17704 | -24.7098 | -47.5562 | Iguape | São Paulo | Brazil |
| UNESP17710 | -24.7098 | -47.5562 | Iguape | São Paulo | Brazil |
| UNESP21300 | -25.3988 | -48.8492 | São João da Graciosa, Morretes | Paraná | Brazil |
| UNESP23214 | -25.9155 | -48.9134 | Fazenda Creminário, Serra do Araraquara, Guaratuba | Paraná | Brazil |
| UNESP27568 | -20.7644 | -42.8695 | Mata da Biologia - campus UFV, Viçosa | Minas Gerais | Brazil |
| UNESP6305 | -24.5845 | -48.6009 | PETAR - Núcleo Ouro Grosso, Iporanga | São Paulo | Brazil |
| UNESP6306 | -24.5845 | -48.6009 | PETAR - Núcleo Ouro Grosso, Iporanga | São Paulo | Brazil |
| *MTR 17110 | -16.4378 | -41.1043 | Jequitinhonha, Estrada para Itaobim | Minas Gerais | Brazil |
| *JFT1034 | -13.3537 | -39.0879 | Valença | Bahia | Brazil |
| *MTR17217 | -16.4333 | -40.7832 | Reserva Biológica Mata Escura, Jequitinhonha | Minas Gerais | Brazil |
| *MTR22884 | -22.5991 | -43.223 | Taquara, Duque de Caxias | Rio de Janeiro | Brazil |
| *UFBA7871 | -12.515 | -38.035 | Mata de São João, Reserva Camurujipe | Bahia | Brazil |
| *UNESP38104 | -20.0739 | -43.4065 | Serra do Caraça, Catas Altas | Minas Gerais | Brazil |
| *UFBA7867 | -12.511 | -38.042 | Mata de São João, Reserva Camurujipe | Bahia | Brazil |

**Table S2.** Results of the Benchmarking Universal Single Copy Orthologs (BUSCO) analyses for the complete genome of *Dendropsophus ebraccatus* species.

| ***D. ebraccatus* genome** | **Number** |
| --- | --- |
| Scaffold total | 2,200 |
| Contig total | 3,003 |
| Scaffold sequence total | 2,214,937,069 |
| Contig sequence total | 2,208,244,125 - 0.302% gap |
| Scaffold N/L50 | 6/153,439,414 |
| Contig N/L50 | 65/8,808,153 |
| Scaffold N/L90 | 14/79,427,467 |
| Contig N/L90 | 351/761,973 |
| Max scaffold length | 234,432,908 |
| Max contig length | 53,828,024 |
| Number of scaffolds > 50 KB | 975 |
| % in scaffolds > 50 KB | 98.51% |

**Table S3.** Processing information and ipyRAD summary statistics for specimens sequenced. Raw reads refer to the total number of reads produced during Illumina sequencing; reads passed filter represent post-processing number of reads that remained after filtering for quality, adaptor contamination, ambiguous barcodes, and mitochondrial sequences; reference mapped reads were mapped to the reference genome and the reference unmapped reads were not mapped; total clusters are the number of homologous sequences clusters created with the post-processing reads; mean depth is the mean depth of coverage of a cluster. Heterozygosity estimated (H) and error-estimated (E) were estimated across clusters, and consensus sequences were created for each cluster. The missing data for each individual of *Dendropsophus elegans* is also presented (secondary dataset). Consensus sequences were clustered across specimens, and loci that passed filtering parameters were included in the final data matrix (loci in assembly). *Discarded specimens with low number of reads (<1300,000) or did not pass filtering parameters.

| **Individual** | **reads_raw** | **reads_passed_filter** | **refseq_mapped_reads** | **refseq_unmapped_reads** | **clusters_total** | **clusters_hidepth** | **hetero_est** | **error_est** | **reads_consens** | **loci_in_assembly** | **Missing_data** |
| --- | --- | --- | --- | --- | --- | --- | --- | --- | --- | --- | --- |
| Deleg_H-568_BeSpBr | 1637341 | 1599710 | 534059 | 1065651 | 61140 | 26256 | 0.00413 | 0.002124 | 17471 | 9267 | 0.09232 |
| Deleg_H-579_BeSpBr | 2141318 | 2087957 | 700078 | 1387879 | 66027 | 29170 | 0.004271 | 0.002292 | 19180 | 9351 | 0.078472 |
| Deleg_JC804_MaMgBr | 1523248 | 1477486 | 503936 | 973550 | 64140 | 26627 | 0.006359 | 0.002152 | 17132 | 8971 | 0.109945 |
| Deleg_JFT1035_VaBaBr | 1639208 | 1594457 | 506333 | 1088124 | 60278 | 25827 | 0.005503 | 0.002291 | 16831 | 9081 | 0.105958 |
| Deleg_MRT5820_StJuBaBr | 942092 | 906339 | 296040 | 610299 | 58652 | 19530 | 0.008643 | 0.002306 | 12700 | 7790 | 0.231640 |
| Deleg_MRT5879_StJuBaBr | 1369135 | 1314427 | 437038 | 877389 | 65911 | 26119 | 0.007752 | 0.002107 | 16727 | 8941 | 0.122744 |
| Deleg_MTR12063_LiEsBr | 1396794 | 1350405 | 460767 | 889638 | 62800 | 25519 | 0.008375 | 0.002389 | 16259 | 8762 | 0.146663 |
| Deleg_MTR12145_LiEsBr | 1446182 | 1398357 | 468810 | 929547 | 65924 | 26392 | 0.008086 | 0.002403 | 16771 | 8928 | 0.118548 |
| Deleg_MTR12594_CaSmEsBr | 1391959 | 1347243 | 452021 | 895222 | 63090 | 26561 | 0.007619 | 0.002087 | 16932 | 8986 | 0.126521 |
| Deleg_MTR12606_CaSmEsBr | 992217 | 959865 | 324453 | 635412 | 56050 | 21799 | 0.008416 | 0.002186 | 14027 | 8284 | 0.191355 |
| Deleg_MTR17020_BoSpBr | 1452352 | 1399688 | 469211 | 930477 | 68579 | 25284 | 0.004678 | 0.002227 | 16696 | 9090 | 0.109106 |
| Deleg_MTR17021_BoSpBr | 1250501 | 1198821 | 393819 | 805002 | 65636 | 23684 | 0.005651 | 0.002334 | 15604 | 8835 | 0.138061 |
| Deleg_MTR17218_JeMgBr | 1249458 | 1209080 | 419689 | 789391 | 58578 | 24441 | 0.007533 | 0.002301 | 15681 | 8696 | 0.135753 |
| Deleg_MTR17562_MaMgBr | 1502556 | 1445522 | 479833 | 965689 | 66441 | 27123 | 0.006972 | 0.002272 | 17308 | 8984 | 0.107007 |
| Deleg_MTR22883_DuRjBr | 1084159 | 1054166 | 374685 | 679481 | 53949 | 22167 | 0.006083 | 0.002283 | 14598 | 8551 | 0.155476 |
| Deleg_UFBA7872_MsBar | 597280 | 577130 | 190619 | 386511 | 47453 | 12655 | 0.005308 | 0.001041 | 8672 | 5181 | 0.512798 |
| Deleg_UFBA7873_MsBar | 1003753 | 982474 | 322621 | 659853 | 49755 | 21122 | 0.004869 | 0.000777 | 14621 | 8003 | 0.203944 |
| Deleg_UFRN3666_VcMgBr | 1899915 | 1826494 | 615458 | 1211036 | 73285 | 30166 | 0.007283 | 0.002113 | 19077 | 9230 | 0.098405 |
| Deleg_UFRN9039_SaoAlBr | 2422022 | 2364618 | 787995 | 1576623 | 66248 | 29286 | 0.004348 | 0.00215 | 19085 | 9061 | 0.111414 |
| Deleg_UFRN9158_EtSeBr | 2482049 | 2434103 | 815808 | 1618295 | 66881 | 29990 | 0.004856 | 0.002108 | 19483 | 9268 | 0.082039 |
| Deleg_UFRN9700_VaBaBr | 2506803 | 2457418 | 806008 | 1651410 | 68210 | 30498 | 0.005704 | 0.002168 | 19429 | 9296 | 0.087284 |
| Deleg_UFRN9705_VaBaBr | 1923275 | 1883312 | 608650 | 1274662 | 63217 | 28652 | 0.005516 | 0.002101 | 18382 | 9236 | 0.086865 |
| Deleg_UNESP17704_IgSpBr | 1501813 | 1454283 | 492198 | 962085 | 60305 | 24423 | 0.002461 | 0.002018 | 16523 | 9457 | 0.067561 |
| Deleg_UNESP17710_IgSpBr | 2236015 | 2182114 | 735594 | 1446520 | 75503 | 28598 | 0.002559 | 0.002051 | 19185 | 9614 | 0.052035 |
| Deleg_UNESP21300_MoPrBr | 1562589 | 1505351 | 500226 | 1005125 | 66346 | 24758 | 0.002102 | 0.002064 | 16862 | 9473 | 0.067142 |
| Deleg_UNESP23214_GuPrBr | 1022095 | 973908 | 336701 | 637207 | 56269 | 20894 | 0.001797 | 0.002271 | 14391 | 8736 | 0.130088 |
| Deleg_UNESP27568_VcMgBr | 2172870 | 2109993 | 728151 | 1381842 | 72452 | 30459 | 0.006747 | 0.002153 | 19360 | 9271 | 0.080360 |
| Deleg_UNESP6305_IpSpBr | 1606041 | 1546376 | 502649 | 1043727 | 62554 | 26344 | 0.002256 | 0.002139 | 17740 | 9496 | 0.065253 |
| Deleg_UNESP6306_IpSpBr | 1579820 | 1524898 | 497376 | 1027522 | 68144 | 25770 | 0.002202 | 0.002238 | 17454 | 9479 | 0.071128 |
| *Deleg_JFT1034_VaBaBr | 154699 | - | - | - | - | - | - | - | - | - | - |
| *Deleg_MTR17110_JeMgBr | 12802 | - | - | - | - | - | - | - | - | - | - |
| *Deleg_MTR17217_JeMgBr | 79366 | - | - | - | - | - | - | - | - | - | - |
| *Deleg_MTR22884_DuRjBr | 131612 | - | - | - | - | - | - | - | - | - | - |
| *Deleg_UFBA7867_SjBaBr | 451079 | - | - | - | - | - | - | - | - | - | - |
| *Deleg_UFBA7871_SjBaBr | 537408 | - | - | - | - | - | - | - | - | - | - |
| *Deleg_UNESP38104_CaMgBr | 3002 | - | - | - | - | - | - | - | - | - | - |

**Figure S1.** Sparse nonnegative matrix factorization (sNMF) cross-entropy results. The number of populations *k* = 4 was smaller than *k* = 3 and selected for the downstream analyses.

**Figure S2.** Correlogram showing the Pearson correlation coefficients between principal components (PC1 and PC2), geographical variables (Latitude and Longitude), and selected bioclimatic variables (bio_4, bio_5, bio_8, bio_13, bio_19). The color scale indicates the strength and direction of the correlations, with blue representing positive and red representing negative correlations. The size of the circles is proportional to the magnitude of the correlation coefficients, ranging from -1 to 1.
