# Supplementary material for: Integrating Genomic Tools to Predict Climate Adaptation and Vulnerability across a Latitudinal Gradient in a Brazilian Atlantic Forest Treefrog (Dendropsophus elegans)
Source: Research Square preprint supplement (doi:10.21203/rs.3.rs-7706720/v1), 2025-10-27
Supplement: Supplementary file 2 [file 8e6c8bee9c2b176b1a9f05fc.xlsx]

## Sheet: Sheet1
Table 1. List of genes found on the Genome–environment association analysis. Each row represents a genetic variant potentially associated with an environmental variable. CHROM indicates the chromosome or scaffold where the variant is located, and POS is the genomic coordinate (base pair position) of the variant. ID-GENE refers to the gene identifier or annotated gene name linked to the variant. R…
CHROM	POS	ID-GENE	REF	ALT	Description	Function	BLAST
1- NC_091454.1	184041750	SMAD3	A	C	SMAD family member 3	Involved in TGF-beta signaling, a pathway implicated in development and environmental stress	no-
1 - NC_091454.1	187103384	KIF16B	A	G	kinesin family member 16B	Encodes a kinesin motor protein associated with vesicle transport	yes
2 - NC_091455.1	126988024	LOC138783491	A	G	-	unknown	no
2 - NC_091455.1	174444014	BNC2	T	C	basonuclin zinc finger protein 2	Regulates dermal pigmentation; polymorphisms under selection by UV radiation and thermal skin balance	yes
3 - NC_091456.1	32732603	MIS18A	A	G	MIS18 kinetochore protein A	Plays roles in cell cycle regulation and differentiation	yes
3 - NC_091456.1	124254540	MTMR11	C	T	myotubularin related protein 11	Involved in membrane trafficking and cellular stress responses	yes
7 - NC_091460.1	116909143	EREG	A	G	epiregulin	Participates in axon guidance and possibly other developmental processes.	no
8 - NC_091461.1	92215154	LOC138800073	T	A	zinc finger protein 154-like	Pseudogene	no
9 - NC_091462.1	34063041	RAPGEF4	G	A	Rap guanine nucleotide exchange factor 4	cAMP sensor involved in stress response, neuronal thermoregulation, and metabolic signaling	no
11 - NC_091464.1	69340948	ROBO2	A	T	roundabout guidance receptor 2	Involved in axon guidance and developmental pathways	no
13 - NC_091466.1	11451017	LOC140105996	G	A	guanylate cyclase 2G-like	unknown	no
14 - NC_091467.1	74325700	LOC138801615	T	C	uncharacterized LOC138801615	unknown	yes
